# Supplementary material for: Freshman seminar: Exploring the 5E instructional model in Introduction to Dentistry
Source: Research Square preprint supplement (doi:10.21203/rs.3.rs-6912879/v1), 2025-08-08
Supplement: Supplementary file 1 [file a3c2c8aa2fc75e4bdf4c075a.docx]

**Questionnaire**

1. **Are you willing to participate in pre-internship clinical practice in dentistry during winter/summer vacations?**

A. Willing

B. Either is fine

C. Already have winter vacation plans / Unwilling

**2. What is your satisfaction with "Introduction to Dentistry"?**

1 (Very dissatisfied) - [ ] 2 - [ ] 3 - [ ] 4 - [ ] 5 - [ ] 6 - [ ] 7 - [ ] 8 - [ ] 9 - [ ] 10 (Very satisfied)

**Part One Comparing diversified teaching methods with the single direct instruction method in "Introduction to Dentistry"**

Score 1 (Weekly) - [ ] 2 - [ ] 3 - [ ] 4 - [ ] 5 - [ ] 6 - [ ] 7 - [ ] 8 - [ ] 9 - [ ] 10 (Strongly)

**3. How would you rate the preference（Score 1-10） of the following teaching methods?**

3.1 Single direct instruction (SDI)

3.2 Diversified teaching methods (DTM)

**4、How would you rate the richness （Score 1-10） of the following teaching methods?**

4.1 SDI

4.2 DTM

5、**How would you rate the clarity（Score 1-10）of the following teaching methods?**

5.1 SDI

5.2 DTM

6、**How would you rate the teacher-student interaction（Score 1-10）of the following teaching methods?**

6.1 SDI

6.2 DTM

7、**How would you rate the relaxation (Score 1-10) of the following teaching methods?**

7.1 SDI

7.2 DTM

8、**How would you rate the interestingness (Score 1-10) of the following teaching methods?**

8.1 SDI

8.2 DTM

9、**Do you think the following teaching methods are helpful in stimulating your interest and curiosity in professional learning? (Score 1-10)**

9.1 SDI

9.2 DTM

**10、Do you think the following teaching methods are helpful in enhancing your confidence in professional learning？(Score 1-10)**

10.1 SDI

10.2 DTM

**11、Do you think the following teaching methods are helpful in reducing your learning stress? (Score 1-10)**

11.1 SDI

11.2 DTM

**12、Do you think the following teaching methods are helpful in alleviating your classroom anxiety? (Score 1-10)**

12.1 SDI

12.2 DTM

**13、Do you believe the following teaching methods are helpful in establishing your sense of professional belonging and honor? (Score 1-10)**

13.1 SDI

13.2 DTM

**14、Do you think the following teaching methods are helpful in enhancing your professional theoretical knowledge? (Score 1-10)**

14.1 SDI

14.2 DTM

**15、Do you believe the following teaching methods are helpful in enhancing your professional clinical skills? (Score 1-10)**

15.1 SDI

15.2 DTM

**16、Do you believe the following teaching methods are helpful in improving your doctor-patient communication skills and confidence? (Score 1-10)**

16.1 SDI

16.2 DTM

**17、Do you think the following teaching methods are helpful in clarifying your future professional direction and choices?**

17.1 SDI

17.2 DTM

**Part Two Comparing multiple methods with one another**

Score 1 (Weekly) - [ ] 2 - [ ] 3 - [ ] 4 - [ ] 5 - [ ] 6 - [ ] 7 - [ ] 8 - [ ] 9 - [ ] 10 (Strongly)

**1. How would you rate the satisfaction （Score 1-10） of the following teaching methods?**

1.1 Direct instruction (DI)

1.2 Group-discussion class (GD)

1.3 Hands-on classes (HC)

1.4 Maxillofacial sketching courses (SC)

1.5 Immersive learning in dental museums/factories (IL)

1.6 Flipped classrooms (FC)

**2. How would you rate the preference（Score 1-10） of the following teaching methods?**

2.1 DI

2.2 GD

2.3 HC

2.4 SC

2.5 IL

2.6 FC

**3、How would you rate the richness （Score 1-10） of the following teaching methods?**

3.1 DI

3.2 GD

3.3 HC

3.4 SC

3.5 IL

3.6 FC

4、**How would you rate the clarity（Score 1-10）of the following teaching methods?**

4.1 DI

4.2 GD

4.3 HC

4.4 SC

4.5 IL

4.6 FC

5、**How would you rate the teacher-student interaction（Score 1-10）of the following teaching methods?**

5.1 DI

5.2 GD

5.3 HC

5.4 SC

5.5 IL

5.6 FC

6、**How would you rate the relaxation (Score 1-10) of the following teaching methods?**

6.1 DI

6.2 GD

6.3 HC

6.4 SC

6.5 IL

6.6 FC

7、**How would you rate the interestingness (Score 1-10) of the following teaching methods?**

7.1 DI

7.2 GD

7.3 HC

7.4 SC

7.5 IL

7.6 FC

8、**Do you think the following teaching methods are helpful in stimulating your interest and curiosity in professional learning? (Score 1-10)**

8.1 DI

8.2 GD

8.3 HC

8.4 SC

8.5 IL

8.6 FC

**9、Do you think the following teaching methods are helpful in enhancing your confidence in professional learning？(Score 1-10)**

9.1 DI

9.2 GD

9.3 HC

9.4 SC

9.5 IL

9.6 FC

**10、Do you think the following teaching methods are helpful in reducing your learning stress? (Score 1-10)**

10.1 DI

10.2 GD

10.3 HC

10.4 SC

10.5 IL

10.6 FC

**11、Do you think the following teaching methods are helpful in alleviating your classroom anxiety? (Score 1-10)**

11.1 DI

11.2 GD

11.3 HC

11.4 SC

11.5 IL

11.6 FC

**12、Do you believe the following teaching methods are helpful in establishing your sense of professional belonging and honor? (Score 1-10)**

12.1 DI

12.2 GD

12.3 HC

12.4 SC

12.5 IL

12.6 FC

**13、Do you think the following teaching methods are helpful in enhancing your professional theoretical knowledge? (Score 1-10)**

13.1 DI

13.2 GD

13.3 HC

13.4 SC

13.5 IL

13.6 FC

**14、Do you believe the following teaching methods are helpful in enhancing your professional clinical skills? (Score 1-10)**

14.1 DI

14.2 GD

14.3 HC

14.4 SC

14.5 IL

14.6 FC

**15、Do you believe the following teaching methods are helpful in improving your doctor-patient communication skills and confidence? (Score 1-10)**

15.1 DI

15.2 GD

15.3 HC

15.4 SC

15.5 IL

15.6 FC

**16、Do you think the following teaching methods are helpful in clarifying your future professional direction and choices?**

16.1 DI

16.2 GD

16.3 HC

16.4 SC

16.5 IL

16.6 FC
