# Supplementary figures and images for: Freshman seminar: Exploring the 5E instructional model in Introduction to Dentistry
Source: Research Square preprint supplement (doi:10.21203/rs.3.rs-6912879/v1), 2025-08-08

Supplementary Figure 1

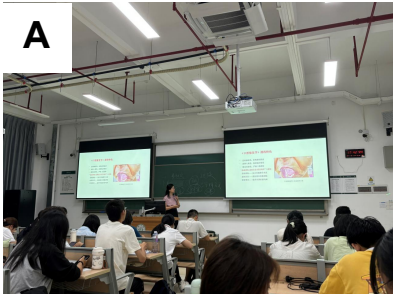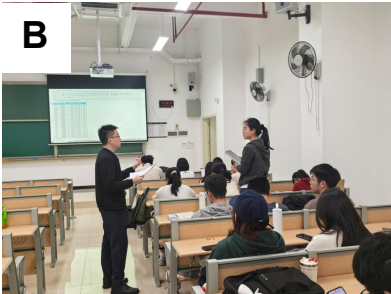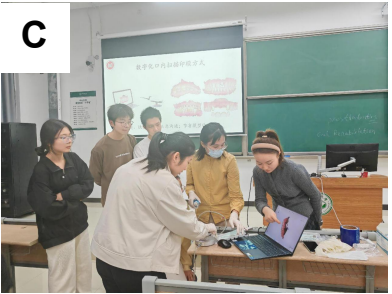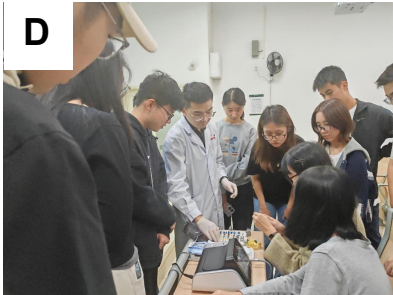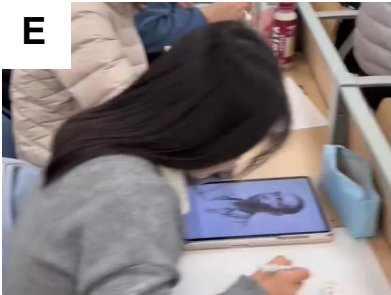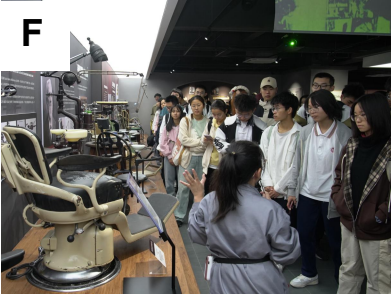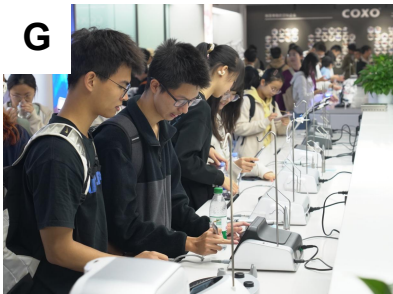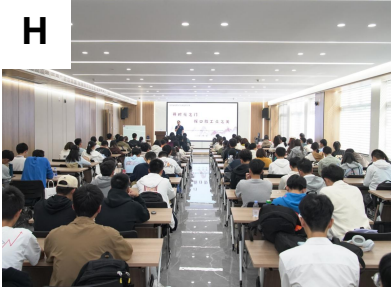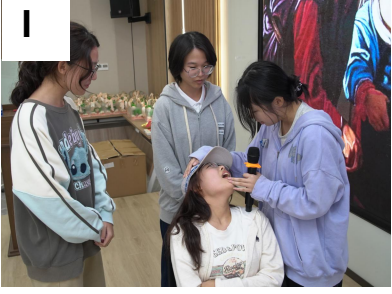

Supplement: Supplementary file 1 [file c04db30a5a7631651445160c.pdf]
